1 **Feedback of Individual Genetic and Genomics**  
2 **Research Results: A Qualitative Study Involving**  
3 **Grassroots Communities in Uganda**

4 **Short Title: Feedback of Individual Genetics and Genomics Research Results**  
5 **Grassroots Communities**

6  
7 **Authors:** Joseph Ochieng<sup>1,2\*</sup>; Betty Kwagala<sup>3</sup>; John Barugahre<sup>4</sup>;

8 Marlo Möller<sup>5</sup>; Keymanthri Moodley<sup>2</sup>

9  
10 **Joseph Ochieng;** [ochienghoe@yahoo.com](mailto:ochienghoe@yahoo.com) ; +256 772 426681

11 **Betty Kwagala;** [kkwagala@gmail.com](mailto:kkwagala@gmail.com)

12 **John Barugahare;** [johnbarug@yahoo.com](mailto:johnbarug@yahoo.com)

13 **Marlo Möller;** [marlom@sun.ac.za](mailto:marlom@sun.ac.za)

14 **Keymanthri Moodley;** [km@sun.ac.za](mailto:km@sun.ac.za)

15  
16 **\* Corresponding author**

17 Joseph Ochieng; Department of Anatomy, School of Biomedical Sciences, College of  
18 Health Sciences, Makerere University. P.O Box 7072, Kampala Uganda.

19 **Email:** [ochienghoe@yahoo.com](mailto:ochienghoe@yahoo.com) This preprint reports on research that has not been certified by peer review and should not be used to guide clinical practice.

20

21 <sup>1</sup> Makerere University School of Biomedical Sciences

22 <sup>2</sup> Stellenbosch University, Centre for Medical Ethics and Law, Faculty of Medicine  
23 and Health Sciences

24 <sup>3</sup>Makerere University School of Business and Management Studies

25 <sup>4</sup> Makerere University School of Humanities

26 <sup>5</sup> DSI-NRF Centre of Excellence for Biomedical Tuberculosis Research; South  
27 African Medical Research Council Centre for Tuberculosis Research; Division of  
28 Molecular Biology and Human Genetics, Faculty of Medicine and Health  
29 Sciences, Stellenbosch University, Cape Town.

30

31

32 **Conflict of Interest:** The authors declare that they have no competing interests.

33

34

35 **Acknowledgements:**

36 We are grateful to all the individuals in the various communities who participated in  
37 this study.

38

39

40 **Words (7786 Words)**

## 41 **Abstract: (372 Words)**

42 **Background:** Genetics and genomics research (GGR) is associated with several  
43 challenges including, but not limited to, implications of sharing research findings with  
44 participants and their family members, issues of confidentiality, determining  
45 appropriate methods for providing genetic or genomic information to individuals tested,  
46 and ownership of DNA obtained from the samples. Additionally, GGR holds significant  
47 potential risk for social and psychological harms.

48 A considerable amount of research has been conducted with resultant literature and  
49 global debate on return of genetic and genomics testing results, but such  
50 investigations are limited in the African setting, including Uganda.

51 The objective of the study was to assess perceptions of grassroots communities on if  
52 and how feedback of individual genetics and genomics testing results should be  
53 carried out in a Ugandan setting.

54

55 **Methods:** This was a cross-sectional study that employed a qualitative  
56 exploratory approach. A total of 42 individuals from grassroots communities  
57 representing three major ethnic groupings participated in five deliberative focus  
58 group discussions. Data were analysed through content analysis along the main  
59 themes of the study. NVivo software (QSR international 2020) was used to support  
60 data analysis and illustrative quotes were extracted.

61 **Results:** Of the 42 respondents 23 (55%) were male with an age range of 18-77  
62 years. Most (70%) were small scale farmers, and the majority were Christians, who

63 were married and had children. They all lived in a rural community in one of the three  
64 regions of the country and had no prior participation in GGR. All the respondents  
65 were willing to undergo genetics testing and receive feedback of results with the main  
66 motivation being diagnostic and therapeutic benefits as well as facilitating future health  
67 planning. Content analysis identified three themes and several sub-themes including  
68 1) the need to know one's health status; 2) ethical considerations for feedback of  
69 findings and 3) extending feedback of genetics findings to family and community

70 **Conclusion:** Participation in hypothetical genetics and genomics research as  
71 well as feedback of testing results is acceptable to individuals in grassroots  
72 communities. The strong therapeutic misconception linked to GGR is concerning and  
73 has implications for consent processes and genetic counselling. Privacy and  
74 confidentiality, benefits, risks as well as implications for sharing need to be  
75 considered for such feedback of results to be conducted appropriately.

76

77 **Key words:** Feedback, Individual Genetic and Genomic Research Results,  
78 Grassroots Communities

79

## 80 **Introduction**

81 Although the expanding applicability of knowledge generated from genetics and  
82 genomics research (GGR) holds great promise for discoveries in the biomedical and  
83 socio-behavioural sciences, it also raises challenging ethical and societal issues. Such  
84 challenges include, but are not limited to, implications of sharing research findings with

85 participants and their family members, issues of confidentiality, determining  
86 appropriate strategies for providing genetic or genomic information to individuals  
87 tested, and ownership of Deoxyribonucleic Acid (DNA) obtained from the samples [1-  
88 3]. Furthermore, GGR has significant potential risk for social and psychological harms,  
89 for example, studies that generate information about an individual's health risks can  
90 provoke anxiety and confusion, damage familial relationships, and/or compromise the  
91 individual's future financial status [4-7]. Results could also possibly be used as a basis  
92 for ethnic/racial segregation or discrimination such as denial of insurance coverage or  
93 employment [8].

94 A significant amount of research has been conducted with resultant literature and  
95 global debate on return of genetic and genomics testing results [9-14]. Despite the  
96 fact that international policies for return of individual genetic research findings are  
97 still evolving, general consensus appears to be that in order to consider findings for  
98 feedback a number of criteria need to be met including the ability to assess the  
99 evidence base for potentially disease causing genetic variants in relation to the  
100 concerned population(s); assessment of whether the particular finding is beneficial to  
101 the individual; ensuring that patients are appropriately informed of the implications of  
102 the findings for their disease or treatment, and referral for follow-up care while  
103 seeking guidance of the Research Ethics Committee (REC) [15]. However, such  
104 debate with a focus on the issues that affect the African setting is still limited [16-22].  
105 This situation is exacerbated by the fact that many countries in the African region  
106 lack ethical guidelines on how such ethical issues can be addressed [23].  
107 GGR has been conducted for about 20 years in the Ugandan setting and is expected  
108 to continue to increase owing to its potential for advancing targeted disease detection  
109 and interventions for both communicable and non-communicable diseases in this

110 resource-limited setting [24]. Yet there is a paucity of knowledge on the ethical, legal  
111 and social challenges that accompany GGR in the country [25-28]. There have been  
112 a few publications on perspectives of researchers [26, 28] and research participants  
113 [27] but virtually no published literature on perspectives of grassroots communities  
114 who are based in rural settings and are considered to have limited interaction with the  
115 outside world.

116 We set out to assess grassroots communities' perceptions on whether feedback of  
117 individual genetics and genomics testing results should occur in a Ugandan setting to  
118 inform research ethics guideline development.

119

120

## 121 **Methods**

### 122 **Study design and Setting:**

123 This was a cross-sectional study that employed a qualitative exploratory approach.  
124 The study was conducted by a team of academics comprising bioethicists and  
125 medical scientists with experience in qualitative research. JO a male medical doctor  
126 and academic with bioethics training and experience, BK a female PhD sociology  
127 academic of more than 20 years and JB a male PhD Philosophy academic led most  
128 of the interviews. They were assisted by eight research assistants including four  
129 females proficient in local languages. Data was collected between January and  
130 February 2021. Participants were recruited from remote grassroots communities in  
131 three regions of Uganda each representing a major ethnic grouping. Five deliberative  
132 focus group discussions (dFGDs) involving 42 participants were conducted across

133 the three regions of the country. Two dFGDs were conducted in each region with  
134 one involving youth 18-35 years and the other involving individuals of 36 years and  
135 above. However, in one of the regions only one FGD involving individuals older than  
136 35 years was conducted. The communities were selected from the eastern, northern  
137 and west Nile regions of Uganda to represent the main ethnic groupings. Participants  
138 were recruited from predetermined ethnic groups, districts and sub-counties. The  
139 specific local communities were selected by the research assistants identified at the  
140 respective sub-counties.

### 141 **Data collection:**

142 The dFGDs were conducted in open spaces in the compounds of health facilities,  
143 schools or churches a safe distance away from non-participants. Data was collected  
144 in accordance with the Covid-19 prevention measures including hand sanitization,  
145 face masking, social distancing and in open spaces of compounds under trees in  
146 order to limit any potential for infection spread

147 Data collection entailed face to face deliberative focus group discussions lasting  
148 between 90 to 120 minutes and were conducted in the respective local languages of  
149 the concerned community. Initially, participants were asked general questions on  
150 awareness and knowledge about genetics and genomics. This was followed by a 30-  
151 minute explanatory session on the meaning and role of genetics and genomics as  
152 well as the testing and feedback of results lasting about 30 minutes. This education  
153 session was followed by a discussion moderated by the FGD guide. The discussion  
154 included willingness to participate in GGR, willingness to receive feedback following  
155 genetic testing, conditions for feedback and extending feedback to family and

156 community. The discussions were audio recorded and complemented by notes taken  
157 by a research assistant.

## 158 **Data management and analysis:**

159 Recorded information was transcribed verbatim, checked for accuracy and later  
160 translated into English. Data were analysed through content analysis along the main  
161 themes of the study. Content analysis was conducted using a comprehensive  
162 thematic matrix that included identifying codes, categories and themes to identify  
163 common patterns arising from the narratives. The coding was done both deductively  
164 and inductively, whereby we started deductively with a set of codes, but then  
165 inductively come up with new codes as we sifted through the data. Transcripts were  
166 further reviewed for emerging themes which were integrated into the thematic matrix.  
167 The researcher, JO was involved in applying and confirming application of codes  
168 across all transcripts and disagreements were resolved by cross checking with the  
169 recorded data. NVivo software (QSR international 2020) was used to support data  
170 analysis and illustrative quotes were extracted.

## 171 **Ethical considerations:**

172 Ethical review and approval was obtained from the Makerere University School of  
173 Biomedical Sciences Higher Degrees and Research Ethics Committee ref. SBS 628  
174 and the Health Research Ethics Committee, Stellenbosch University ref. HREC  
175 16853, followed by clearance by the Uganda National Council for Science and  
176 Technology (UNCST) ref. SS268ES.



177 Both male and female individuals of 18 years and above who had provided written  
178 informed consent participated in the study. No participant identifying information was  
179 recorded.

180

## 181 Findings

182 Of the 42 respondents 23 (55%) were male, age range 18-77 years, 70% small scale  
183 farmers, and majority were Christians, married and had children. They all lived in a  
184 rural community in one of the three regions of Uganda and had no prior genetics and  
185 genomics research experience. All the respondents were willing to undergo genetics  
186 testing and receive feedback of results. The main reasons for receiving results were  
187 the need to know one's health condition and to seek care or plan for the future as well  
188 as that of their loved ones.

189 Content analysis identified three themes and a number of sub-themes including 1) the  
190 need to know one's health condition, with subthemes of benefits of feedback and  
191 concerns, challenges and implications for sharing; 2) considerations for feedback of  
192 findings, with sub-themes adequate informed consent, genetic counselling as well as  
193 privacy and confidentiality; and 3) extending feedback of genetics findings to family  
194 and community.

195

### 196 **1. The need to know one's health condition:**

197

198 Almost all the respondents replied in the affirmative when asked about their  
199 willingness to receive feedback of hypothetical genetic test results because they felt  
200 that it was useless to take the test if they would not receive results. All respondents  
201 stated that genetic testing is acceptable and would contribute to improved knowledge  
202 of the field. All respondents also indicated that findings of such testing need to be  
203 shared with individuals tested because it was considered important to know one's  
204 health status. Knowing of one's genetics information was a major motivating factor  
205 for participating in genetics and genomics research or taking a genetic test.

206 *"When I go to test, I go because I know that I want to know my health status, so if am*  
207 *tested and they don't give me my results it is almost like I have not done any tests, so*  
208 *if I get tested my results should be brought back so that in case I have any underlying*  
209 *conditions I can look for help."* **FGD 007**

210 *"I want to know my results because if you test for anything you have to know your*  
211 *results so that I can know if am healthy or sick."* **FGD 008**

212 *"Yes, it should be given. It should be given to me the patient so that I can know exactly*  
213 *what they have found out."* **FGD 007**

214 Respondents felt that for any test carried out, the results will either turn out to be  
215 positive or negative, and for any underlying condition the results will turn out positive  
216 meaning that feedback helps one to start living a new life. Respondents noted that  
217 even if the treatment may not be available for the diagnosed condition, it would still  
218 help them understand their health condition and plan for their future. Thus, if results  
219 are not shared, the individuals tested will remain unsettled and anxious wondering  
220 what could be happening to their bodies. Some thought that if treatment is not

221 available at the testing centre, it could as well be sought from other hospitals  
222 provided one knew what their health problem is.

223

224 *“I want to know the results of those tests because I want to know my health status so*  
225 *that if am sick, I go to the hospital, if am not I start planning my life afresh.” FGD*  
226 **008**

227

228 *“It is right because it helps me to know my status which gives me the strength to*  
229 *take care of my children.” FGD 008*

230

231 A minority of respondents felt that they would wish to know their test results only if  
232 the condition is treatable. Otherwise, it would be stressful and cause unnecessary  
233 anxiety for one to be told of a disease, yet it has no available treatment.

234 *“Using my body parts, I am not interested. If they are to teach me my blood group, I*  
235 *understand but if it is something else am not interested.” FGD 007*

236 Respondents had various reasons for wanting to know the results of their hypothetical  
237 genetics and genomics testing including being able to plan for the future, knowing their  
238 health conditions and being able to resolve some of the community myths particularly  
239 following death of individuals. For others, since the samples were from their bodies,  
240 they had a right to know the outcomes of the testing and researchers are obligated to  
241 provide such feedback. Some felt that knowing the results would be helpful in guiding  
242 the individuals on seeking therapy early enough.

243 *“So that people can clearly know the actual cause of the death of a person, not that*  
244 *they are left to imagine.” FGD009*

245 *“The results of the DNA should be given to me because it was part of my body that*  
246 *was removed, it was nobody’s body part, it was mine.” FGD 007*

247 *“I think the results should be given to you because by the time you went for the test*  
248 *you wanted to know your health status so the results should be given to you so that*  
249 *you can know about your health status better.” FGD 007*

250

251

252

### 253 **Benefits of feedback for genetics findings:**

254 Respondents highlighted several benefits associated with feedback of genetic testing  
255 results including the fact that it helps individuals to know what to do in their life and  
256 that of their relatives. It can guide the medical professionals and scientists to search  
257 for treatment, and institute preventive measures before disease manifests. It also  
258 facilitates the government to plan and build hospitals that will specialise in managing  
259 those diseases. Others felt that it will be an added advantage because they will have  
260 gained more health information about themselves to help predict the future.

261

262 *“I think it is basically the knowledge after getting the information that really prepares*  
263 *you to be free. Now like us at least we have heard and we have gotten to know what*  
264 *it is all about, so it gives me the freedom (courage) to participate freely without the fear*  
265 *that I had before.” FGD 006*

266 *‘It would help me know what the illness is and whether the complication is from my*  
267 *mother or my father, so that I can alert them and see how to protect my*  
268 *children.’* **FGD009**

269 *‘When I receive feedback at the right time and there are no other discouragements*  
270 *and at the same time the person who is giving me feedback first begins by counselling*  
271 *and guiding me, reminding me of what went on and how to live afterwards.’* **FGD 006**

272  
273 Others felt genetic testing and associated feedback of results is good because they  
274 get to know their health condition and plan on how to protect themselves in case,  
275 they have potential to develop any illness. Some thought it an added advantage  
276 because in certain circumstances individuals live in an environment of uncertainty  
277 and suspicion for particular traits, yet after testing you can confirm your genetic  
278 lineage which would explain why things are happening that way. A desire for  
279 ancestral information was expressed.

280  
281 *‘We know that these diseases could have come from the ancestral line of our*  
282 *parents, so knowing the result is good because you can be able to trace whether it is*  
283 *coming from your mother’s line or father’s line and inform them to protect the next*  
284 *generation of the family.’* **FGD 009**

285 *‘Yes, I want to know the results of this DNA test because it helps me to know the*  
286 *status of my blood and also know my clan too.’* **FGD 008**

287

288 About one third of the respondents including both men and women linked  
289 participation in genetics and genomics research as well as receiving feedback of  
290 results to establishing the paternity of their children if other family members were  
291 tested too.

292

293 *"I want to acknowledge that my father made my sister to go through the same. At*  
294 *first, he denied being the father to my sister but when they went for a DNA test, it*  
295 *was confirmed that he was the true father. He no longer has any doubts and he is*  
296 *instead happy now." FGD 006*

297

298 *"In fact, this has happened to me before; my husband denied my second child*  
299 *saying I cheated and when we went to the hospital to prove, their DNA was the same*  
300 *and he even did not apologize for accusing me of adultery". FGD 009*

301

302 *"It is a good thing because there have been cases of domestic violence because of a*  
303 *man doubting the paternity of some of his children, such would help solve some of*  
304 *these problems causing violence in the homes." FGD 009*

305

306

## 307 **Concerns, Challenges and implications for feedback of** 308 **genetics and genomics testing results:**

309 Respondents noted that although genetics and genomics research and testing as  
310 well as the associated feedback of results is good, they have experienced situations  
311 where disclosure of cancer results to patients was felt to have hastened death. They

312 also noted that if one has a 50% chance of developing or not developing cancer,  
313 giving such information can cause some trauma, hence the need for caution. Others  
314 were worried about the cost of such testing which they expected to be too much for  
315 them to afford, hence appealed for affordable genetics testing costs within reach of  
316 the low-income earners.

317

318 *“To bridge the gap of language barrier like when somebody is an illiterate and does*  
319 *not know how to read and write, if the research department was able to bring the*  
320 *projection in form of a video, somebody who does not know how to read will be*  
321 *able to interpret what is going on. So, it would influence that person and attract*  
322 *more attention to that.” FGD 006*

323

324 Some respondents noted that feedback of genetics results has the potential to reveal  
325 discordance in paternity and this has the potential to cause family break ups and  
326 associated psychological harm and suffering both to the child and the discordant  
327 parent. There was also concern about being diagnosed with a condition that is beyond  
328 the affordability of the family which could end up consuming all the family resources.

329

330 *“The problem is, it is a bit expensive and then those services are very far, otherwise*  
331 *I would really say that it is a good thing to do.” FGD 006*

332

333 *“The DNA is what distinguishes one person from another. For example, you can tell*  
334 *that this child does not belong to this family and does not belong to the other*

335 *family... It means that, that child should not stay with that family and the mother*  
336 *should take that child where it rightfully belongs.” FGD 006*

337 *“With results there are two things involved. If the results turn out to be good, this brings*  
338 *happiness, but if the results are not good, this will automatically bring violence*  
339 *in the house.” FGD 008*

340

## 341 **2. Considerations for feedback of findings:**

342 Although respondents expressed willingness to receive feedback of genetics testing  
343 results, they highlighted several requirements that need to be put in place before  
344 results are shared.

### 345 **Adequate Informed consent:**

346 Respondents observed the need for adequate informed consent before testing is  
347 carried out and at the time of feedback of results. Informed consent would facilitate  
348 individuals’ understanding of what they are getting involved in as well as the  
349 associated implications. This would help the individuals to make an informed  
350 decision about whether to be tested or not as well as their need for feedback of  
351 results. As highlighted below

352 *“May be improving on learning resources or materials to make people understand*  
353 *things better.” FGD006*

354 *“Availing information out there to the people explaining the importance of doing it*  
355 *and why we do it can really play a very big role in causing (a positive) change in*



356 *attitude and perception of the people. So that is what I would suggest that we*  
357 *continue doing. It will be good to reach out to more people.” FGD006*

358 *‘If they come and teach me very well on what exactly they want to do plus let me know*  
359 *of the cons I can accept to participate in this DNA testing, it will also let me*  
360 *know my health status and they will also help me in case I have any health*  
361 *complications.” FGD 007*

362 *‘If they teach me well and I fully understand how this research works I can accept to*  
363 *participate.” FGD007*

364 *‘If they also tell me very well whereby, I also fully understand this research I can accept*  
365 *to participate so that I can be evidence to the community to let them know that*  
366 *it is not a bad initiative after all so that the research runs smoothly.” FGD007*

367

368 Respondents highlighted the need for research teams to facilitate participant  
369 understanding of the genetic information through a process which would include  
370 the use of visual aids in order to facilitate the information delivery process and  
371 promote understanding.

372 *‘What I think is that there should be a projector to show us photographic images of*  
373 *this genetic science and the procedure of genetic testing. When you see that the*  
374 *other child resembles the parents it makes you to appreciate that you are*  
375 *studying something that exists.” FGD 006*

376

377 Respondents highlighted the need for a clear appreciation of the condition being tested  
378 so that they are well informed of what is likely to happen to their bodies. They stressed

379 the desire to know the results to the extent possible and if the information turns out to  
380 be complicated, then the feedback can involve their parents or close relatives. Thus,  
381 the need for the informed consent process to employ a number of visual aids to  
382 facilitate participant's understanding.

383 *"If it were possible, I would want to see the nature of the disease through an image*  
384 *or explained to me thoroughly."* **FGD 009**

385

386 *"I will accept because they would have taught me and I would have understood very*  
387 *well what they want to do. This will allow me to make up my mind and also I will*  
388 *know exactly what to do and also know what exactly is needed for my life."*  
389 **FGD 007**

390

### 391 **Genetic counselling:**

392 Adequate genetic counselling by a well-trained professional preferably a doctor was  
393 considered essential for individuals before getting their genetic testing results.  
394 Respondents felt that good counselling would help allay anxiety associated with  
395 receiving genetics results. Counselling would also help spell out any misconceptions  
396 or misunderstandings associated with genetics and genomics. Additionally, many  
397 respondents preferred to receive the feedback results in person because then the  
398 person giving the feedback of results would have an opportunity to guide them on  
399 which hospital can provide any necessary medication.

400 *“Therefore, the counselling that is given before feedback of results from there*  
401 *(research centre) can excite and encourage me to continue to do that test and even*  
402 *to encourage my clan members on the same.” FGD 006*

403 *“Of course, as doctors they know how to describe the results of a test; they should*  
404 *be professional in breaking the news to me.” FGD 009*

405 *“Whoever is breaking the news has to sit calmly face to face with me to explain the*  
406 *results for me to understand well, without sending me into a shock.” FGD 010*

407

408

409 Respondents observed that before disclosure of the results and associated health  
410 condition, there should be a proper way of disclosing information and this may be by  
411 telling the individuals what to eat to prevent or control that condition. That It would  
412 be better to first advise the individuals on how to care for themselves and then  
413 disclose the condition. They also observed that It's not good to rush to disclose  
414 findings because someone might breakdown.

415

416 *” The doctor should first counsel me because sometimes if they found a disease and*  
417 *they just gave me a paper, it can make me unsettled but if the doctor talks to me, tells*  
418 *me that we found a disease but take care of yourself, take your medication, this will*  
419 *make me not have any fears.” FGD 008*

420 *“It is not right for a doctor to show my results to someone else to bring to me. This is*  
421 *because that person doesn't have the experience like the doctors who can counsel*  
422 *me.” FGD 007*

423 *“For me I would need to be counselled properly before giving me the results.”*

424 **FGD010**

425 *“If my samples were picked from home, that means that my result should be brought*  
426 *home and also before giving me results they should counsel me but they should not*  
427 *just give me the results abruptly. My mind should be settled before giving me my*  
428 *results.” FGD 007*

429

430 **Privacy and confidentiality:**

431 Respondents stressed the need for a quiet and private environment at the time of  
432 disclosing the results to individuals who have been tested. Since genetics and  
433 genomics testing results is regarded as private information, the need to observe  
434 privacy and confidentiality is a growing reality that should be respected at all times.  
435 Many respondents proposed that at the time of disclosing findings, it should be only  
436 the doctor and the individual who was tested.

437 *“Earlier you talked about confidentiality which automatically means that in case they*  
438 *pick my sample for DNA my results will definitely be given to me meaning that*  
439 *whatever it is it will be between me, the doctors and the people carrying out the tests.”*

440 **FGD 007**

441 *“The results should be given to me directly. In case they find any medical*  
442 *complications, the person who has brought the results should explain to me their*  
443 *findings and also if possible, bring medicine and prescribe for me how to take the*  
444 *medication. If you give the results to someone else the person will begin telling people*  
445 *behind my back how my condition is very worrying and bad.” FGD 007*

446 *“Whoever is breaking the news has to sit calmly face to face with me to explain the*  
447 *results for me to understand well, without going into a shock.” FGD 010*

448

449 While most respondents felt that the results should be shared directly with the  
450 individual who was tested, some thought that they would need support and presence  
451 of a family member at the time of getting the results. Others proposed that if it’s a  
452 condition that affects the family, then the doctor can disclose to the whole family. This  
453 would help everyone to know what condition is affecting the family since It’s not  
454 something that can be kept secret.

455 *“For me I want to be with my parents when I am getting the results from my*  
456 *hereditary testing.” FGD010*

457 *“The results should be given to me personally because it is me supposed to tell my*  
458 *parents and also, I would want it in written form because the records can help me in*  
459 *future, let’s say my condition becomes worse, I need to show those results at the*  
460 *hospital. If you get your results via message, you can’t go and show a message to a*  
461 *doctor so I feel it’s better to receive in written form.” FGD 007*

462

### 463 **3. Extending feedback of genetics findings to family and** 464 **community**

465

466 **Extending feedback to family:**

467 Respondents had varied opinions on extending feedback of results to their relatives  
468 with some stressing that the results only belong to the individual who was tested  
469 while others thought they could share findings with close family members. Some  
470 highlighted the fact that if one is likely to suffer from genetics related conditions, then  
471 it was necessary to share the findings of genetic testing with individuals who will take  
472 care of them in case they become sick.

473

474 *“The family members need to know because some diseases may need extra*  
475 *attention and care like meals on time, special foods etc, so that the family members*  
476 *can be helpful in looking after you.” FGD010*

477 *“I also feel it is right to tell my parents because it gives my brothers and also my wife*  
478 *the opportunity to also go and test in case, I turn out to be positive of any illness so*  
479 *that other children don’t inherit the diseases too.” FGD 007*

480

481 Other reasons for extending feedback of genetics results to family included the need  
482 for informing others and help them know of their predisposition to disease early so as  
483 to take appropriate action. To others genetic information was considered a family  
484 health issue which affects all members of the family and so they have to be told the  
485 results.

486 *“To me I think it depends on the type of disease because sometimes it might be a non-*  
487 *life-threatening condition or it can be like epilepsy which doesn’t go hand in hand with*  
488 *noise so the people back home should know how to handle me. So, if the feedback of*  
489 *results is to me, then at least my parents have to be there and also, they should put in*

490 *the records so that in case another disease comes in the doctors will have an idea on*  
491 *how to help me.” FGD 007*

492 *“It helps the family to understand the problem that they are faced with so that it’s able*  
493 *to plan together, how to help in case there is any one sick and others are not, the*  
494 *family can understand how to plan and handle such situations.’ FGD 006*

495 *“Because it helps on the side of treatment and health and unity of the family.” FGD*  
496 **006**

497

498 Reasons for not extending feedback of genetics testing results to family included the  
499 fear that some members may not understand the meaning of such information or  
500 would be unable to handle the associated stress and anxiety.

501 *“My view is that your test results should only be given to you because they are*  
502 *private and will only affect you.” FGD 010*

503

504 *“These results will remain in my house; I will not share them out anyhow.” FGD 008*

505

## 506 **Extending feedback of genetic results to the community members**

507 Some respondents felt it was acceptable to share their genetics results with the  
508 community because they would support you in case you are unwell. Others observed  
509 that it was right to share because the DNA testing results do not necessarily mean that

510 they are only testing for diseases. So trusted people in their circle who may not be  
511 relatives, can know the results and advise on what to do.

512 *“For me I would tell all of them, so that they are aware of what the doctor has*  
513 *advised me to do and stand with me in support.”***FGD010**

514 *“It is good to share results with other people because it safeguards their health. If a*  
515 *person knows that I have a particular genetic disease, it will be up to them to decide*  
516 *whether to produce with me (children) or not. If a person chooses to marry me, that is*  
517 *their risk.”* **FGD 006**

518 *“It is good for the community to know because these days people assume*  
519 *someone’s death up to the extent of accusing other community members with whom*  
520 *the person could have had a grudge, to avoid such assumptions, they should know.”*  
521 **FGD010**

522 *“I will accept that my wife should know, the community should also know, there are*  
523 *other diseases that can be spread, those near me can even help me if I am weak, my*  
524 *neighbours should also know.”* **FGD 008**

525

526 Respondents who did not favour extending feedback of genetics results with  
527 community thought that it was private health information for the family that should not  
528 be shared with non- family members. Others felt like sharing such information  
529 exposes the health condition of the family and that might end up causing the family  
530 to be ridiculed or segregated.

531 *“Yes, my results are important to my family members to know but not outside of*  
532 *family because sometimes that is a secret we have in our house.”* **FGD 008**



533

534 *“It depends on the type of disease, if it is a disease that I can survive with by taking*  
535 *care of myself I feel it is ok to keep it to myself but if it is a condition that needs people’s*  
536 *help like me getting lost, then the community should know about it.” FGD 007*

537 Some respondents who were opposed to extending feedback to the community felt  
538 like sharing such information might be used against you by some members of the  
539 community with resultant stigma and potential discrimination

540 *“I think it’s a bad idea because people who do not like you take advantage of the*  
541 *information to spread bad information about you and you become the talk of the*  
542 *town, so I think it’s best to give it to the owner of the results.” FGD 010*

543

## 544 **Strategies for sharing feedback of genetics and genomics research**

### 545 **results:**

546 Regarding the strategies for sharing feedback to family, several approaches were  
547 suggested by the respondents. Some respondents felt that they should have  
548 exclusive rights to disclose the information, hence the doctor should provide them  
549 with enough information that can be used to inform others. Some respondents  
550 thought the doctors would do the job of extending feedback of results to family  
551 members because they are better informed and equipped with the necessary  
552 genetics counselling skills. While others thought that they would pass information to  
553 an elder in the clan or family who would in turn take the responsibility of conveying  
554 the information to the rest of the family through approaches like family meetings.

555

556 “Alternatively, the testing team *can come home pick samples one by one (testing can*  
557 *be carried out at the home of the participants), it will be right to counsel me together*  
558 *with my parents so that they can know what to do, those are the ways our results can*  
559 *come back to us.” FGD 007*

560

561

562

## 563 Discussion

564 We set out to assess the views of grassroots communities in Uganda on if and how  
565 feedback of hypothetical genetics and genomics research results can occur. Our  
566 study results show that this type of feedback of results was acceptable to all  
567 respondents. Several reasons for needing feedback of results were identified  
568 including and especially, the need to know one’s health status and to plan for the  
569 future. Several strategies were proposed if such feedback was to be conducted  
570 appropriately.

571 The need to know one’s health condition can be a benefit to research participants  
572 particularly in an African rural setting where genetic testing is out of reach of almost all  
573 individuals. Feedback to research participants is a growing reality and an ethical  
574 obligation that should be incorporated in the research processes as highlighted by  
575 several ethics guidelines [15, 29,30]. Although the usual call for feedback has been  
576 directed to other fields of research and just emerging in GGR because of the  
577 anticipated implications, such fears can be appropriately addressed via mechanisms  
578 like adequate consent processes and genetic counselling by qualified genetic

579 counsellors, observance of privacy and confidentiality as well as sharing results that  
580 are potentially beneficial or actionable. Related work among genomics research  
581 participants and genomic researchers in Uganda has also highlighted the need for  
582 feedback of GGR results [27,28]. Additionally, need for feedback of GGR results has  
583 been considered by research participants in Botswana as a form of solidarity and as  
584 a reciprocity obligation of researchers that can make participants feel valued as part  
585 of a mutual relationship [ 21]. Dissemination, beneficence and reciprocity have been  
586 considered as essential components of a framework for enhancing ethical genomic  
587 research with indigenous communities in the USA [31]. Additionally, respondents in  
588 our study felt that knowing one's test results would help them seek early treatment or  
589 prevention, creating the impression that treatment for genetically predisposed  
590 conditions is available. Although this was a rural non-research setting, it's Important  
591 to note that therapeutic misconception where participants perceive research as care  
592 rather than experimentation are very common. And such misconception may mislead  
593 individuals into participating in research for diagnostic or therapeutic purposes, yet  
594 most genetic studies may not yield results that can benefit health or predict risk of  
595 disease. Even in cases where accurate diagnosis can occur, many diseases  
596 identified may not be treatable.

597 For feedback of genetics and genomics research results to be conducted  
598 appropriately, several strategies were proposed by the respondents including  
599 adequate consent processes, genetic counselling as well as privacy and  
600 confidentiality. Informed consent for research participants is an ethical requirement  
601 that should be carried out as a continuous process starting before recruitment,  
602 through to implementation in the post study period. Such consent processes should  
603 be suitable for participants and be provided in language that is easily

604 understandable. The need for meaningful informed consent has been highlighted by  
605 participants of a genomics research study in Uganda that revealed recall bias about  
606 their participation in the concerned research study [27]. GGR has been challenged  
607 by the fact that genetics and genomics terminology and associated vocabulary may  
608 be difficult to translate in many of local languages in Uganda making it more difficult  
609 to achieve adequate and meaningful consent. Recent work that reviewed consent  
610 documents for 13 H3Africa genomics projects observed that genetics was mostly  
611 explained in terms of inherited characteristics, heredity and health, genes and  
612 disease causation, or disease susceptibility and only one project made provisions for  
613 the feedback of individual genetic results [30]. Challenges regarding meaningful  
614 informed consent for GGR have been observed particularly when it comes to sharing of  
615 human biological samples and data in the context of international collaborative  
616 research [33, 34]. In order to address some of the challenges associated with informed  
617 consent in GGR, some commentators have proposed tailoring the informed consent  
618 process based on a ten-point framework which includes among others the study  
619 design, data and biological sample sharing, reporting study results to participants,  
620 cultural context, language and literacy and potential for stigmatization of study  
621 populations [35]. However, this proposed framework needs to be clearly interpreted  
622 and studied if it is to be meaningfully applied. In addition, for consent to be  
623 meaningful it should be coupled with relevant information on the proposed genetics  
624 testing and its implication. Such genetic counselling is essential and should be  
625 provided before testing and during feedback of results. Although genetic counselling  
626 is a developing field in emerging economies like South Africa [36], there is a relative  
627 lack of qualified genetic counsellors and the associated counselling in many of the  
628 low resource settings in Africa including Uganda [28,37]. Yet such genetic

629 counselling would go a long way in addressing issues like implications of genetic  
630 testing and feedback of results to the individual, the family, the community,  
631 therapeutic misconception, privacy and confidentiality as well as the common beliefs  
632 in the Ugandan setting of genetic testing being primarily for paternity testing. Since  
633 the concept of genetic counselling is relatively new in our setting and virtually non-  
634 existent in the rural communities, respondents felt that the doctor who is most  
635 knowledgeable should be the one to conduct the counselling. This challenge can be  
636 addressed by capacity building for genetic counselling.

637 In addition, the consent forms should be explicit on aspects like who would have  
638 access to genetic results and whether return of results concerning paternity  
639 information should be done. If so, this should be approved by the REC before data  
640 collection is initiated. Otherwise, it's always a dilemma when researchers discover  
641 sensitive information after running the tests and seek guidance from an equally  
642 unprepared REC. For example, during genetic testing for sickle cell disease, which is  
643 prevalent in Uganda, it's not uncommon to discover discordant genetic information  
644 between the child and the male parent. It would be good if the consent documents  
645 approved by the REC clearly state if such paternity information will be provided to  
646 both parents.

647 Our study findings also highlight a situation where the participants stress the need  
648 for privacy and confidentiality of their genetic testing and return of results on one  
649 hand, yet most would prefer the presence of a family member during feedback of  
650 results a process which they thought could as well be done at participants' homes.  
651 Hence the concept of confidentiality in these communities needs to be clarified and  
652 could imply keeping information not only to the individual tested but within their close  
653 family. Other aspects that need to be appropriately addressed to facilitate

654 understanding of the genetics and genomics research concepts include meaningful  
655 community engagement (CE). Such engagement would help researchers understand  
656 community-based practices for example the meaning of privacy and confidentiality,  
657 and whether it should be handled at the individual level or family level. Some  
658 commentators have proposed the Tygerberg Research Ubuntu-Inspired Community  
659 Engagement Model which would require RECs/IRBs to play a role in requiring a CE  
660 plan for every study that is community based, and scientific journals to require a  
661 paragraph on CE in publication of relevant research projects. This would ensure  
662 moving CE from a guidance requirement to a regulatory requirement, emphasizing  
663 that it is a critical component of a robust consent process in research and that it  
664 ought to be embedded within research projects, where applicable [38].

665 Many respondents were agreeable to extending feedback of genetics and genomics  
666 testing results to family because genetics information was considered to belong to the  
667 whole family since it is inherited. The need for extending feedback to family and  
668 sometimes the wider community could be explained by the fact that most of the  
669 individuals in the Ugandan rural setting live in communities and support each other for  
670 their livelihood and during times of sickness. It is also important because family and  
671 community members play an important role in the provision of health care to patients.  
672 However, despite the fact that most of the respondents were agreeable to extending  
673 feedback of GGR results to family, fewer respondents supported such feedback to the  
674 wider community and only for particular health conditions. The practice of extending  
675 feedback of GGR results needs to be studied further and should be done on a case-  
676 by-case basis because the implications may vary across the different cases. This is in  
677 line with recommendations from a USA consultative team involving a working group of  
678 national experts of ELSI which among other recommendations suggested that  
679 researchers should elicit participants' preferences on such extension of feedback to  
680 family but also recommended further research on the subject matter [39]. Other  
681 countries like Belgium have legislated laws that would allow health care  
682 professionals to disclose genetic information considered beneficial to family  
683 members in case the individual tested is not willing to do so [40].  
684 It has also been recommended that it is imperative that the privacy and  
685 confidentiality of the person enrolling in the study should be respected but in cases  
686 where there is benefit in sharing results with family members, the original participant  
687 should grant permission because just like feedback to individuals, feedback should  
688 not be imposed on family members, but should be based on their voluntary consent  
689 [14]. A study involving REC chairpersons in the USA showed that 62% of the REC

690 chairs agreed that participants should be informed that their results could be offered  
691 to family members and asked to indicate their choice, but such a statement may not  
692 be adequate informed consent [41]. Keeping genetic information and associated  
693 diseases confidential may be very difficult particularly in the Ugandan setting where  
694 the costs of medical treatment to a great extent are met by the relatives and  
695 sometimes the wider community who may inadvertently learn of the patients' genetic  
696 condition. Since individuals in the communities are acceptable to extending feedback  
697 of GGR results to family members, it's up to the regulators to devise appropriate  
698 frameworks that would guide the process while respecting the participants'  
699 preferences, privacy and confidentiality.

700 Finally, most GGR conducted in Uganda to address ethical, social and legal issues  
701 has been carried out in well-established research settings, and the views that have  
702 informed debate on ethical conduct of GGR in the country are mainly those of  
703 research participants, researchers and research regulators [25-28, 42]. Our addition  
704 of the grassroots communities will contribute a new dimension with an additional  
705 group of stakeholders whose views will enrich the literature as well as the proposed  
706 ethics guidelines for conduct of GGR in Uganda which was the goal of this study. We  
707 believe the ethics guidelines for conduct of GGR will go a long way in informing  
708 regulation and oversight of GGR in the country which is currently not guided by any  
709 specific guidelines.

710

711 **Limitations of the study:**



712 The individuals who participated in the study were research naive and may not have  
713 fully appreciated the implications of participation in GGR and feedback of the  
714 associated results.

715 Since the study was conducted in three different languages, the researchers needed  
716 assistance from individuals fluent in the respective languages to conduct the dFGDs  
717 and this might have affected the quality of the interviews and the subsequent data.

718 Additionally, the dFGD were conducted in three different local languages and later  
719 translated into English which could affect the quality of data.

720 Given the fact that this was a qualitative study, although the findings provide a deep  
721 understanding of the subject matter, they may not be generalizable. However, a wider  
722 range of other stakeholders have been involved in related research which enriches the  
723 generated data.

724

## 725 **Conclusion:**

726 Participation in hypothetical genetics and genomics research as well as feedback of  
727 testing results is acceptable to individuals in grassroots communities. While extending  
728 feedback of genetics and genomic research results to close family members was  
729 generally acceptable, extending feedback to the community was regarded as  
730 acceptable in a limited number of cases only. Reasons for needing feedback of  
731 genetics and genomics research results included the need to know one's health status  
732 and to plan for the future. The strong therapeutic misconception linked to GGR is  
733 concerning and has implications for consent processes and genetic counselling.  
734 Furthermore, the expectation of paternity testing results being embedded in all GGR

735 needs to be managed appropriately. Privacy and confidentiality, benefits, risks as well  
736 as implications for sharing need to be considered for feedback of results to be  
737 conducted appropriately.

738

## 739 **Abbreviations**

740 dFGDs- Deliberative Focus Group Discussions

741 GGR-Genetics and Genomics Research

742 REC-Research Ethics committee

743 UNCST- Uganda National Council for Science and Technology

744

745 **Availability of data and materials:** Data sources are available on  
746 request.

747

## 748 **Authors Contributions:**

749 JO, BK, MM & KM conceptualized this study; JO, BK, JB, developed data collection  
750 tools; JO, BK & JB collected data; JO & BK analysed data; KM and MM reviewed all  
751 transcripts and edited all drafts of the manuscript. All authors provided substantive  
752 intellectual contributions to the study and manuscript and approve of its content.

753

## 754 **References:**

755

- 756 1. Tindana, P., Bull, S., Amenga-Etego, L., de Vries, J., Aborigo, R., Koram, K., et al.  
757 (2012). Seeking consent to genetic and genomic research in a rural Ghanaian setting:  
758 a qualitative study of the MalariaGEN experience. *BMC medical ethics*, 13(1), 15.
- 759 2. Marshall, P. A., Adebamowo, C. A., Adeyemo, A. A., Ogundiran, T. O., Vekich, M.,  
760 Strenski, T, et al. (2006). Voluntary participation and informed consent to international  
761 genetic research. *American Journal of Public Health*, 96(11), 1989-1995.
- 762 3. Committee for Protection of Human Subjects , University of California, Berkeley.  
763 (2017). CPHS Guidelines – Genetic/Genomic Research.
- 764 4. Clayton et al. (1995). Informed Consent for Genetic Research on Stored Tissue  
765 Samples. *JAMA*. 274(22):1786-1792.
- 766 5. Reilly, P., Boshar, M. & Holtzman, S. (1997). Ethical issues in genetic research:  
767 disclosure and informed consent. *Nat Genet* 15, 16–20
- 768 6. Botkin et al. (2015). Points to Consider: Ethical, Legal, and Psychosocial Implications of  
769 Genetic Testing in Children and Adolescents. *ASHG* 97, 6–21,
- 770 7. Jean E. McEwen; Joy T. Boyer; Kathie Y. Sun. (2013). Trends in Genetics, 29 (6);  
771 375-382.
  
- 772 8. Muller-Hill, B. (1994). Lesson from a dark and distant past. *In: Kahse H. and Singer*  
773 *P. (eds.) 2006. Bioethics: Backwell Philosophy Anthologies. Blackwell.*
- 774 9. Middleton et al. (2016). Attitudes of nearly 7000 health professionals,  
775 genomic researchers and publics toward the return of incidental results from  
776 sequencing research. *European Journal of Human Genetics* 24, 21–29;  
777 doi:10.1038/ejhg.2015.58;
- 778 10. Simon CM, Shinkunas L, Brandt D, and Williams JK. (2012). Individual genetic and  
779 genomic research results and the tradition of informed consent: exploring U.S. review  
780 board guidance. *J Med Ethics*. July ; 38(7): 417–422.
- 781 11. Simon CM, Williams JK, Shinkunas L, Brandt D, Daack-Hirsch S, and Driessnack M.  
782 (2011). Informed Consent and Genomic Incidental Findings: IRB Chair Perspectives.  
783 *J Empir Res Hum Res Ethics*. 2011 December ; 6(4): 53–67.  
784 doi:10.1525/jer.2011.6.4.53.
- 785 12. Dyke et al. (2019) Points-to-consider on the return of results in epigenetic research.  
786 *Genome Med*. May 23;11(1):31. doi: 10.1186/s13073-019-0646-6.
- 787 13. David KL<sup>1</sup>, Best RG<sup>2</sup>, Brenman LM<sup>3</sup>, Bush L<sup>4,5</sup>, Deignan JL<sup>6</sup>, Flannery D<sup>7</sup>, Hoffman  
788 JD<sup>8</sup>, Holm I<sup>9</sup>, Miller DT<sup>5</sup>, O’Leary J<sup>10</sup>, Pyeritz RE<sup>11</sup>; (2019) Patient re-contact after  
789 revision of genomic test results: points to consider—a statement of the American  
790 College of Medical Genetics and Genomics (ACMG). *Genet Med*. Apr;21(4):769-771.
- 791 14. Phillips A, Bronselaer T, Borry P, Van Hoyweghen I, Vears DF, Pasquier L, Callens S.  
792 Informing relatives of their genetic risk: an examination of the Belgian legal context.  
793 *Eur J Hum Genet*. 2022 Jan 8. doi: 10.1038/s41431-021-01016-3. Epub ahead of print.  
794 PMID: 34997232.
- 795 15. H3Africa Guideline for the Return of Individual Genetic Research Findings.  
796 [https://h3africa.org/wp-](https://h3africa.org/wp-content/uploads/2018/05/H3Africa%20Feedback%20of%20Individual%20Genetic%20Results%20Policy.pdf)  
797 [content/uploads/2018/05/H3Africa%20Feedback%20of%20Individual%20Genetic%20](https://h3africa.org/wp-content/uploads/2018/05/H3Africa%20Feedback%20of%20Individual%20Genetic%20Results%20Policy.pdf)  
798 [Results%20Policy.pdf](https://h3africa.org/wp-content/uploads/2018/05/H3Africa%20Feedback%20of%20Individual%20Genetic%20Results%20Policy.pdf) Accessed January 03, 2021
  
- 799 16. de Vries, J., Bull, S. J., Doumbo, O., Ibrahim, M., Mercereau-Puijalon, O., Kwiatkowski,  
800 D., & Parker, M. (2011). Ethical issues in human genomics research in developing  
801 countries. *BMC medical ethics*, 12(1), 5
- 802 17. Tindana, P., Bull, S., Amenga-Etego, L., de Vries, J., Aborigo, R., Koram, K., et al.  
803 (2012). Seeking consent to genetic and genomic research in a rural Ghanaian setting:  
804 a qualitative study of the MalariaGEN experience. *BMC medical ethics*, 13(1), 15.

- 805 18. Marshall, P. A., Adebamowo, C. A., Adeyemo, A. A., Ogundiran, T. O., Vekich, M.,  
806 Strenski, T, et al. (2006). Voluntary participation and informed consent to international  
807 genetic research. *American Journal of Public Health*, 96(11), 1989-1995.
- 808 19. Wright, G.E., Koornhof, P.G., Adeyemo, A.A. *et al.* (2013). Ethical and legal  
809 implications of whole genome and whole exome sequencing in African  
810 populations. *BMC Med Ethics* 14, 21
- 811 20. de Vries, Jantina; Slabbert, Melodie; Pepper, Michael S. (2012). Ethical, Legal and  
812 Social Issues in the Context of the Planning Stages of the Southern African Human  
813 Genome Programme. *Med Law* 31: 119-152
- 814 21. Ralefala, D., Kasule, M., Wonkam, A. *et al.* Do solidarity and reciprocity obligations  
815 compel African researchers to feedback individual genetic results in genomics  
816 research?. *BMC Med Ethics*. **21**;112 (2020).
- 817 22. Wonkam A, de Vries J. Returning incidental findings in African genomics research. *Nat*  
818 *Genet*. 2020;52(1):17-20. doi:10.1038/s41588-019-0542-4
- 819 23. Ali J, et al. (2021). A scoping review of genetics and genomics research ethics  
820 policies and guidelines for Africa. *BMC Med Ethics*. 2;22(1):39.
- 821 24. The Human Heredity and Health in Africa (H3Africa).<https://h3africa.org/> Retrieved  
822 July 7, 2019
- 823 25. Rutakumwa, R., de Vries, J., Parker, M., Tindana, P., Mweemba, O., & Seeley, J.  
824 (2019). What constitutes good ethical practice in genomic research in Africa?  
825 Perspectives of participants in a genomic research study in Uganda. *Global*  
826 *Bioethics*, 1-15.
- 827 26. Mwaka, E. S., et al. (2021) Researchers' perspectives on return of individual genetics  
828 results to research participants: a qualitative study, *Global Bioethics*, 32:1, 15-33,
- 829 27. Rwamahe Rutakumwa, Jantina de Vries, Michael Parker, Paulina Tindana, Oliver  
830 Mweemba & Janet Seeley (2020) What constitutes good ethical practice in genomic  
831 research in Africa? Perspectives of participants in a genomic research study in  
832 Uganda, *Global Bioethics*, 31:1, 169-183, DOI: 10.1080/11287462.2019.1592867
- 833 28. Ochieng, J., Kwagala, B., Barugahare, J. *et al.* Perspectives and ethical  
834 considerations for return of genetics and genomics research results: a qualitative  
835 study of genomics researchers in Uganda. *BMC Med Ethics* **22**, 154 (2021).  
836 <https://doi.org/10.1186/s12910-021-00724-1>
- 837 29. Uganda National Council for Science and Technology [Internet]. National Guidelines  
838 for Research Involving Humans as Research Participant. 2014 [cited 2016 Oct 28].  
839 Available from: [www.uncst.go.ug](http://www.uncst.go.ug)
- 840 30. Council for international organization of medical sciences (CIOMS) in collaboration  
841 with World Medical Organization (WHO); 2002. International ethical guidelines for  
842 biomedical research involving human subjects. Geneva:.  
843 [www.cioms.ch/publications/laout\\_guide\\_2002/pdf](http://www.cioms.ch/publications/laout_guide_2002/pdf).
- 844 31. Claw, K.G., Anderson, M.Z., Begay, R.L. *et al.* A framework for enhancing ethical  
845 genomic research with Indigenous communities. *Nat Commun* **9**, 2957 (2018).  
846 <https://doi.org/10.1038/s41467-018-05188-3>
- 847 32. Munung NS, Marshall P, Campbell M, *et al*/Obtaining/Obtaining informed consent for  
848 genomics research in Africa: analysis of H3Africa consent documents.*Journal of*  
849 *Medical Ethics* 2016;**42**:132-137.
- 850 33. McGuire AL, Beskow LM. Informed consent in genomics and genetic research. *Annu*  
851 *Rev Genomics Hum Genet*. 2010;11:361-381. doi:10.1146/annurev-genom-082509-  
852 141711
- 853 34. Paulina Tindana, Cornelius Depuur, Jantina de Vries, Janet Seeley & Michael  
854 Parker (2020) Informed consent in genomic research and biobanking: taking feedback  
855 of findings seriously, *Global Bioethics*, 31:1, 200-  
856 215, DOI: [10.1080/11287462.2020.1717896](https://doi.org/10.1080/11287462.2020.1717896)

- 857 35. Rotimi, C.N., Marshall, P.A. Tailoring the process of informed consent in genetic and  
858 genomic research. *Genome Med* **2**, 20 (2010). <https://doi.org/10.1186/gm141>
- 859 36. Kromberg, Jennifer & Wessels, Tina-Marie & Krause, Amanda. (2013). Roles of  
860 Genetic Counselors in South Africa. *Journal of genetic counseling*. 22.  
861 10.1007/s10897-013-9606-2.
- 862 37. Abacan, M., Alsubaie, L., Barlow-Stewart, K. *et al.* The Global State of the Genetic  
863 Counseling Profession. *Eur J Hum Genet* **27**, 183–197 (2019).  
864 <https://doi.org/10.1038/s41431-018-0252-x>
- 865 38. Moodley K, Beyer C. Tygerberg Research Ubuntu-Inspired Community Engagement  
866 Model: Integrating Community Engagement into Genomic Biobanking. *Biopreserv*  
867 *Biobank*. 2019 Dec;17(6):613-624. doi: 10.1089/bio.2018.0136. Epub 2019 Nov 25.  
868 PMID: 31603696; PMCID: PMC6921246.
- 869 39. Wolf, Susan M et al. “Returning a Research Participant's Genomic Results to  
870 Relatives: Analysis and Recommendations.” *The Journal of law, medicine & ethics : a*  
871 *journal of the American Society of Law, Medicine & Ethics* vol. 43,3 (2015): 440-63.  
872 doi:10.1111/jlme.12288
- 873 40. Beskow LM, O'Rourke PP. Return of Genetic Research Results to Participants and  
874 Families: IRB Perspectives and Roles. *J Law Med Ethics*. 2015;43(3):502-513.  
875 doi:10.1111/jlme.12292
- 876 41. Sylvia Nabukenya, Joseph Ochieng, David K-Mafigiri, et al. Experiences and practices of  
877 key research team members in obtaining informed consent for pharmacogenetic research  
878 among people living with HIV: a qualitative study. *Research Ethics*. February 2022.  
879 doi:[10.1177/17470161221076974](https://doi.org/10.1177/17470161221076974)
